# Supplementary material for: Simultaneous production of hydrogen and chlorine through overall brine splitting with a particulate photocatalyst
Source: Royal Society of Chemistry journal article supplement (doi:10.1039/d4cc00136b), 2024-01-01
Supplement: d4cc00136b1.pdf [file d4cc00136b1.pdf]

## Supporting information

# Simultaneous production of hydrogen and chlorine through overall brine splitting with a particulate photocatalyst

*Takumi Okada,<sup>ab</sup> Masanori Kodera,<sup>\*a</sup> Yugo Miseki,<sup>a</sup> Hitoshi Kusama,<sup>a</sup> Takahiro Gunji,<sup>b</sup> and Kazuhiro Sayama<sup>\*ab</sup>*

<sup>a</sup> Global Zero Emission Research Center (GZR), National Institute of Advanced Industrial Science and Technology (AIST), Tsukuba West, 16-1, Onogawa, Tsukuba, Ibaraki, 305-8569 Japan

<sup>b</sup> Department of Pure and Applied Chemistry, Faculty of Science and Technology, Tokyo University of Science, 2641 Yamazaki, Noda, Chiba 278-8510, Japan

Corresponding Authors

\*Kazuhiro Sayama. E-mail address: [k.sayama@aist.go.jp](mailto:k.sayama@aist.go.jp)

\*Masanori Kodera. E-mail address: [masanori.kodera@aist.go.jp](mailto:masanori.kodera@aist.go.jp)

## Contents

Experimental details

Computational details

Figure S1: pH-dependent redox potentials of  $\text{Cl}_2$ ,  $\text{HClO}$ ,  $\text{ClO}^-$ , and  $\text{O}_2$ .

Figure S2: XRD pattern of  $\text{TiO}_2$ .

Figure S3: Schematic of the flow-type reactor.

Figure S4:  $e^-/h^+$  ratio of the products acquired at pH 1.

Table S1: Control experiments of  $\text{TiO}_2$  photocatalyst for brine splitting.

Figure S5: Time course of water splitting over Pt-loaded  $\text{TiO}_2$  in a closed batch-type system.

Figure S6: XRD patterns of Pt-loaded  $\text{TiO}_2$  before and after the reaction.

Figure S7: XPS spectra for Pt4f of Pt-loaded  $\text{TiO}_2$  before and after the reaction.

Figure S8: SEM images of  $\text{TiO}_2$ , Pt-loaded  $\text{TiO}_2$  before and after the reaction.

Figure S9: Time courses of water splitting with 0.1 wt% Pt-loaded  $\text{TiO}_2$  at pH 1.

Table S2: Comparison of the Pt-loaded  $\text{TiO}_2$  used in this study with other brine splitting photocatalytic systems.

Figure S10: Intermediate structures and free energies of HCl oxidation on rutile  $\text{TiO}_2$ .

Figure S11: Intermediate structures and free energies of  $\text{H}_2\text{O}$  oxidation on rutile  $\text{TiO}_2$ .

Table S3:  $\Delta G$  values for the PCET steps in the mechanism underlying the photoinduced oxidation.

Figure S12: Spectrum of the 365 nm LED lamp.

Figure S13: XRD patterns of electrode obtained by calcining Ti plate at 973 K in air for 1 h.

## Experimental details

TiO<sub>2</sub> (rutile, 99.9%; Kojundo Chemical) was modified with a Pt cocatalyst by *in situ* photodeposition, in which the metal nanoparticles were deposited on the reducing sites of the photocatalyst. Briefly, TiO<sub>2</sub> (500 mg) was dispersed in a 10 vol% methanol solution (400 mL) containing an appropriate amount of H<sub>2</sub>PtCl<sub>6</sub>•6H<sub>2</sub>O (98.5+%; FUJIFILM Wako Pure Chemical) using a magnetic stirrer. The resulting mixture was irradiated overnight with 365 nm LED light (CL-1501; Asahi Spectra; see Fig. S9). The obtained powder specimen was filtered, washed with pure water, and then dried at room temperature overnight. X-ray diffractometry (XRD; PANalytical, EMPYREAN) analysis of the TiO<sub>2</sub> powder confirmed the existence of the rutile phase as the main phase structure (Fig. S2).

The photocatalytic reactions were performed in an Ar flow system (1 atm, 5 mL min<sup>-1</sup>; Fig. S3). Briefly, the photocatalyst powder was suspended in a 500 mM NaCl aqueous solution added to a Pyrex side-irradiation cell. The pH of the reactant solution was adjusted using HClO<sub>4</sub> (70.0%–72.0%; FUJIFILM Wako Pure Chemical) or NaOH (97.0+%; FUJIFILM Wako Pure Chemical). The aforementioned LED lamp was used as the light source. The amounts of evolved H<sub>2</sub> and O<sub>2</sub> were determined by gas chromatography (3000A Micro GC device with an MS-5A column, thermal conductivity detector, and Ar carrier; Agilent Technologies). The Cl<sub>2</sub> evolved as gas was trapped in a 4 M NaOH solution to form hypochlorite ions (ClO<sup>-</sup>), whose amount was calculated using the N,N'-bis(2,4-di-sulfobenzyl)tolidine tetrasodium salt method. The total photon flux from LED light was calculated to be 8.5×10<sup>17</sup> s<sup>-1</sup>, which was used for calculating the quantum efficiency.

In this study, the e<sup>-</sup>/h<sup>+</sup> ratio was calculated by the following equation:

$$e^{-}/h^{+} = 2 \times (\text{amount of produced H}_2) / \{ 2 \times (\text{amount of produced Cl}_2 \text{ detected in the NaOH trap}) + 2 \times (\text{amount of produced HClO and ClO}^{-} \text{ in the reaction cell}) + 4 \times (\text{amount of O}_2) \},$$

where, it is confirmed that the amount of HClO and ClO<sup>-</sup> in the reaction cell was negligible.

A TiO<sub>2</sub>/Ti photoelectrode was prepared by calcining a Ti plate (2 × 3 cm<sup>2</sup>) at 973 K for 1 h. As shown in Fig. S13, peaks attributable to rutile and Ti substrate were observed while peaks from anatase or other phases were negligible, which is a similar situation in powder TiO<sub>2</sub> used in the experiments. Pt was modified by photodeposition in a manner similar to that of the particulate photocatalyst.

UV-light-driven photoelectrochemical HClO production was studied using a three-electrode system containing TiO<sub>2</sub>/Ti, Pt wire, and Ag/AgCl as the photoanode, counter electrode, and reference electrode, respectively. The photoanode was immersed in a 500 mM aqueous NaCl solution (30 mL) and illuminated under 365 nm LED light while Ar was bubbled into the anode chamber at 5 mL min<sup>-1</sup>. External bias vs. Ag/AgCl was monitored using a potentiostat (ALS627E, BAS Inc.) while maintaining the anode photocurrent at 0.8 mA. H<sub>2</sub>, O<sub>2</sub>, and HClO were similarly quantified.

## Computational details

Density functional theory (DFT) calculations were performed using Gaussian 16 software.<sup>1</sup> The ground-state geometry was optimized at the hybrid DFT level using the B3LYP functional, which combines Becke's three-parameter exchange function (B3)<sup>2</sup> with the Lee–Yang–Parr (LYP) correlation function.<sup>3</sup> The Pople-type split-valence basis set 6-311+G(d,p)<sup>4</sup> was used for all the systems.<sup>5</sup> The B3LYP/6-311+G(d,p) level provides appropriate geometries for isolated molecules such as H<sub>2</sub>O, O<sub>2</sub>, as well as TiO<sub>2</sub>.<sup>6,7</sup> Frequency calculations were performed to confirm the optimized structures with no imaginary frequencies, which corresponded to real minima on the entire potential energy surface. Furthermore, they were used to compute zero-point vibrational energies.

Cl<sub>2</sub> formation via two-electron oxidation was considered for two HCl molecules on the metal oxide, as follows:

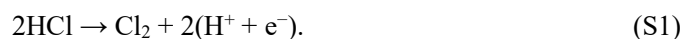

For comparison, the mechanism of H<sub>2</sub>O oxidation on TiO<sub>2</sub>—which involves four proton-coupled electron-transfer (PCET) steps with two H<sub>2</sub>O molecules, as shown below—was investigated.<sup>8–13</sup>

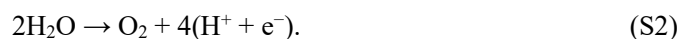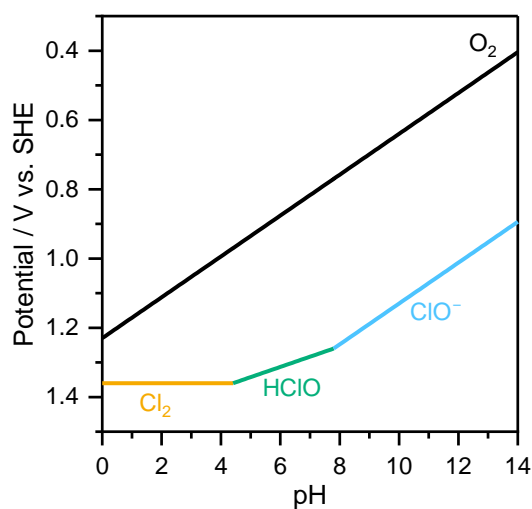

**Fig. S1** Potential gaps between the evolution reactions of O<sub>2</sub>, Cl<sub>2</sub>, HClO, and ClO<sup>-</sup> as a function of pH.

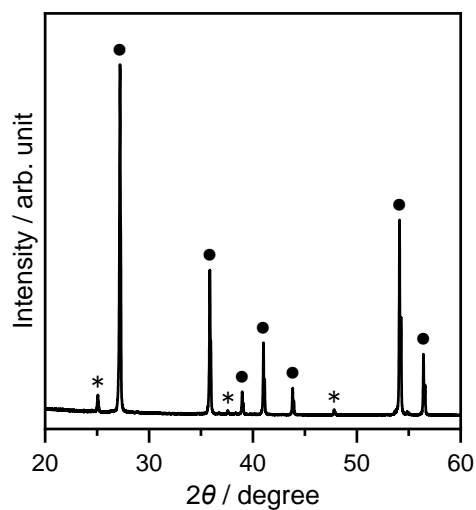

**Fig. S2** XRD pattern of TiO<sub>2</sub>. Closed circles and asterisks indicate diffraction peaks assigned to the rutile and anatase phases, respectively.

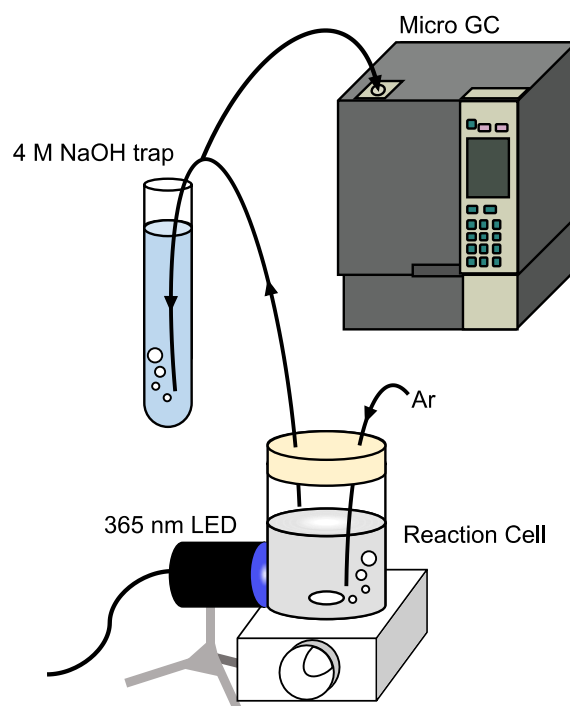

**Fig. S3** Schematic of the flow-type photocatalytic reaction system with 5 mL min<sup>-1</sup> Ar gas flow, showing the evolved Cl<sub>2</sub> gas being trapped in a 4 M NaOH solution.

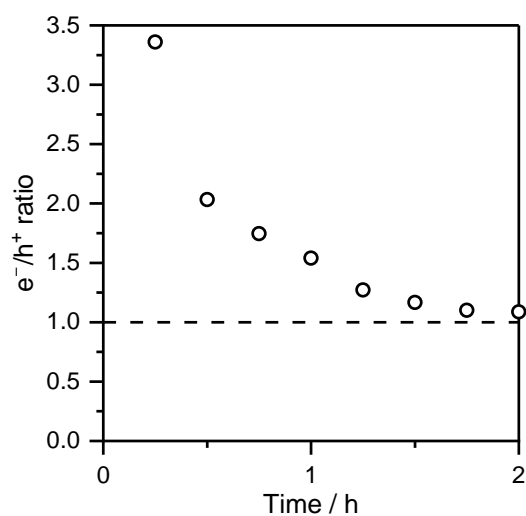

**Fig. S4** Time-dependent  $e^-/h^+$  ratio of the products generated in an aqueous NaCl solution at pH 1 (corresponding to Fig. 2(A)). The dashed line indicates the  $e^-/h^+$  ratio for a stoichiometric reaction.

**Table S1** Control experiments of TiO<sub>2</sub> photocatalyst for brine splitting.

| Entry | Condition                                                 | Amounts of gasses (1 h) / $\mu\text{mol}$ |                |                 | $e^-/h^+$ |
|-------|-----------------------------------------------------------|-------------------------------------------|----------------|-----------------|-----------|
|       |                                                           | H <sub>2</sub>                            | O <sub>2</sub> | Cl <sub>2</sub> |           |
| 1     | Standard <sup>a</sup>                                     | 12.7                                      | 1.4            | 10.3            | 0.97      |
| 2     | Without photocatalyst                                     | 0                                         | 0              | 0               | –         |
| 3     | Adjusting the acidity with H <sub>2</sub> SO <sub>4</sub> | 10.5                                      | 0.3            | 9.3             | 1.1       |
| 4     | Without Pt-modification                                   | 0                                         | 0              | 0               | –         |
| 5     | Using anatase TiO <sub>2</sub> instead of rutile          | 0                                         | 0              | 0               | –         |

<sup>a</sup> Reaction conditions: catalyst, 10 mg; solution, 500 mM NaCl aq. (30 mL, pH adjusted with HClO<sub>4</sub>); light source: 365 nm LED.

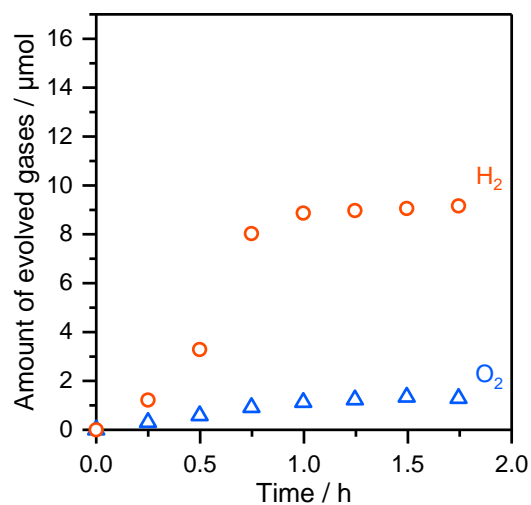

**Fig. S5** Time courses of brine splitting with 0.1 wt% Pt-loaded TiO<sub>2</sub> in a closed batch-type photocatalytic reaction system. Reaction conditions: catalyst, 100 mg; solution, 500 mM NaCl aq. (300 mL, pH 1); light source: 365 nm LED.

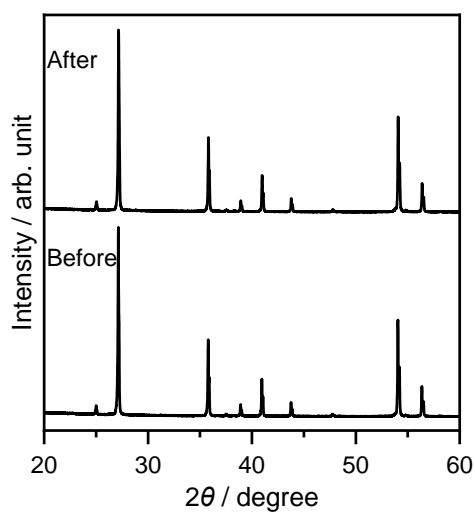

**Fig. S6** XRD patterns of Pt-loaded TiO<sub>2</sub> before and after the 1h of brine splitting reaction.

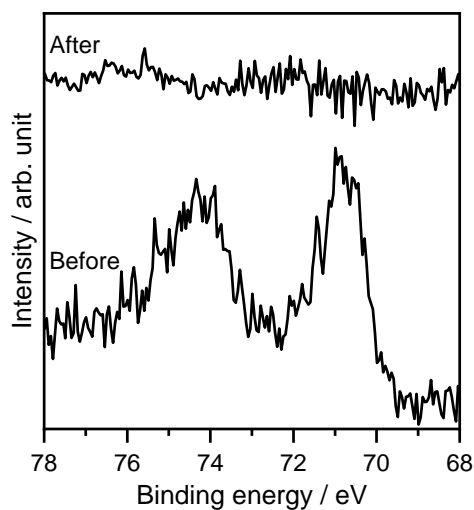

**Fig. S7** XPS spectra for Pt4f of Pt-loaded TiO<sub>2</sub> before and after the 1h of brine splitting reaction.

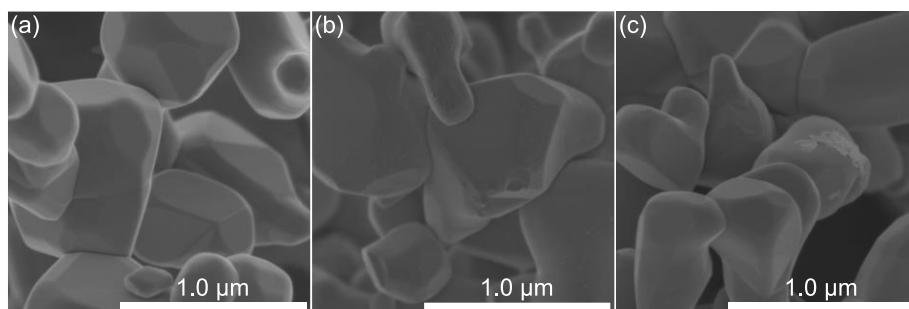

**Fig. S8** SEM images of (a) TiO<sub>2</sub>, Pt-loaded TiO<sub>2</sub> (b) before and (c) after the 1h of brine splitting reaction.

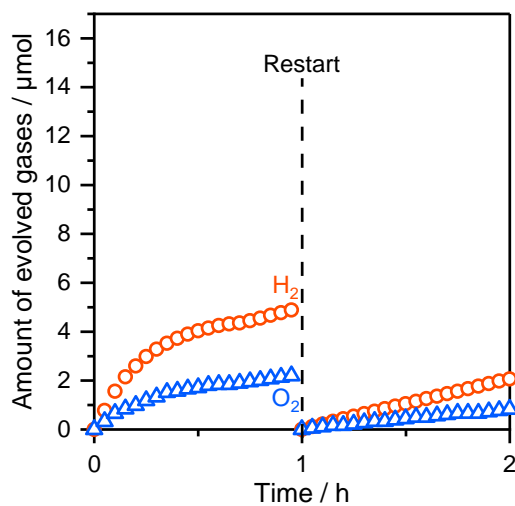

**Fig. S9** Time courses of water splitting without NaCl over 0.1 wt% Pt-loaded TiO<sub>2</sub> at pH 1. Reaction conditions: catalyst, 10 mg; solution, H<sub>2</sub>O (30 mL, pH1); light source: 365 nm LED.



**Table S2** Comparison of the Pt-loaded TiO<sub>2</sub> prepared in this study with other brine splitting photocatalyst systems.

| Photocatalyst                                                                      | Cocatalyst                                                         | Solution            | Light source                   | Activity / $\mu\text{mol h}^{-1}$ |                                        | Production of Cl <sup>-</sup> oxidant | Performance better than in pure water | Ref.          |
|------------------------------------------------------------------------------------|--------------------------------------------------------------------|---------------------|--------------------------------|-----------------------------------|----------------------------------------|---------------------------------------|---------------------------------------|---------------|
|                                                                                    |                                                                    |                     |                                | H <sub>2</sub>                    | O <sub>2</sub>                         |                                       |                                       |               |
| TiO <sub>2</sub>                                                                   | Pt                                                                 | 3.5% NaCl (pH 1)    | 365 nm LED                     | 12.7                              | 1.4                                    | Yes                                   | Yes                                   | Present study |
| P25                                                                                | CuO                                                                | 3.5% NaCl           | 300 W Xe                       | 0.31                              | –                                      | –                                     | –                                     | 14            |
| Brookite TiO <sub>2</sub>                                                          | Pt                                                                 | Artificial seawater | 500 W Hg                       | 0.72                              | Not detected                           | No                                    | No                                    | 15            |
| La <sub>2</sub> Ti <sub>2</sub> O <sub>7</sub>                                     | NiO/Ni                                                             | Seawater            | 400 W Hg                       | 69.6                              | 34.8                                   | No                                    | No                                    | 16            |
| Cd <sub>4</sub> P <sub>2</sub> Br <sub>3</sub>                                     | –                                                                  | Seawater (1 M NaOH) | 400 W Hg ( $\lambda > 395$ nm) | 0.1                               | –                                      | No                                    | No                                    | 17            |
| (Ga <sub>1-x</sub> Zn <sub>x</sub> )(Ni <sub>1-x</sub> O <sub>x</sub> ) (x = 0.12) | Rh <sub>2-y</sub> Cr <sub>y</sub> O <sub>3</sub>                   | Artificial seawater | 450 W Hg ( $\lambda > 400$ nm) | 105                               | 30                                     | Yes                                   | No                                    | 18            |
| CDots-C <sub>3</sub> N <sub>4</sub>                                                | –                                                                  | Seawater            | 300 W Hg ( $\lambda > 420$ nm) | 11.1                              | 5.54                                   | No                                    | No                                    | 19            |
| InGaN/GaN                                                                          | Rh/Cr <sub>2</sub> O <sub>3</sub> , Co <sub>3</sub> O <sub>4</sub> | 3.5% NaCl           | 300 W Xe (AM 1.5G)             | 2.4 $\times 10^3$                 | 1.2 $\times 10^3$                      | No                                    | No                                    | 20            |
| p-GaN/InGaN                                                                        | Rh/Cr <sub>2</sub> O <sub>3</sub> ,                                | Artificial seawater | 300 W Xe (AM 1.5G)             | 1.9–2.4 $\times 10^3$             | 9.5 $\times 10^2$ to 1.2 $\times 10^3$ | Yes                                   | Yes                                   | 21            |

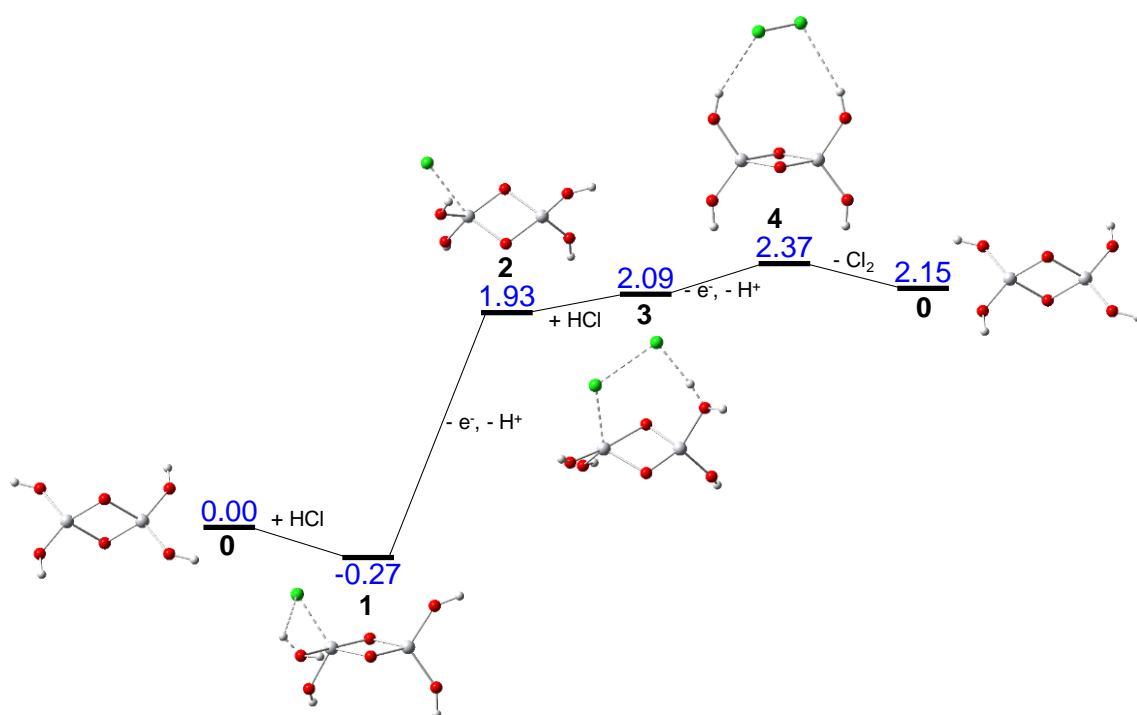

**Fig. S10** Intermediate structures and free energies (eV) of HCl oxidation on rutile TiO<sub>2</sub>. White, red, green, and grey spheres represent H, O, Cl, and Ti, respectively.

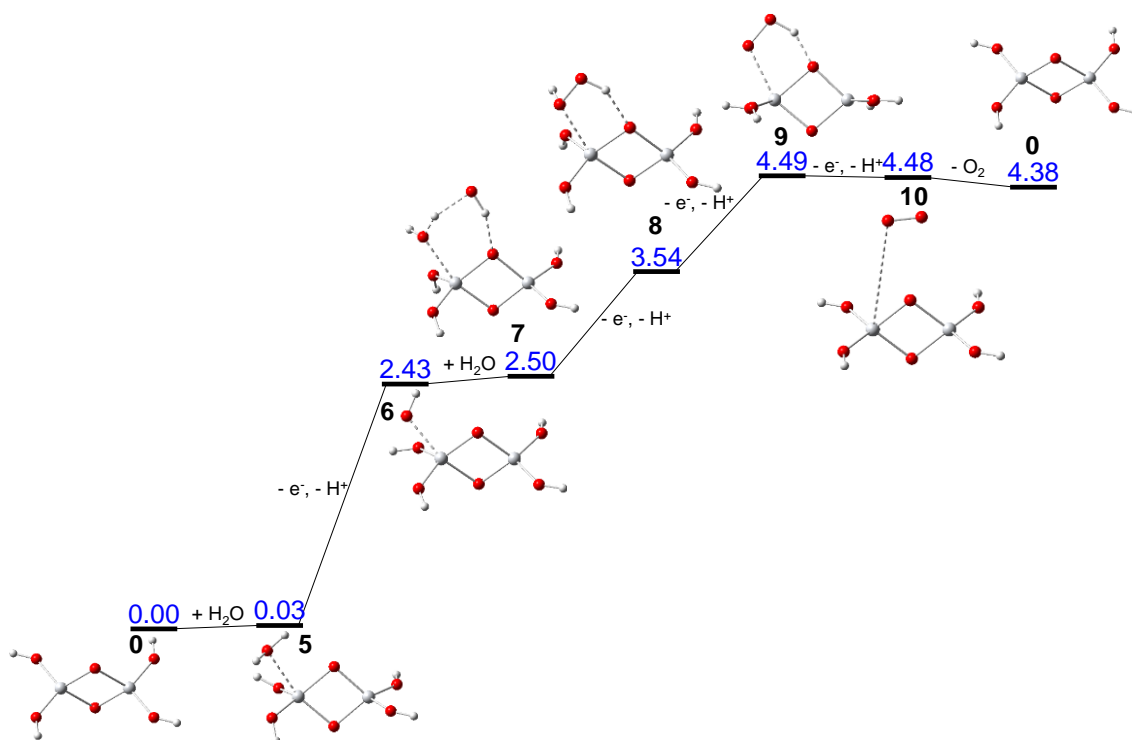

**Fig. S11** Intermediate structures and free energies (eV) of H<sub>2</sub>O oxidation on rutile TiO<sub>2</sub>. White, red, and grey spheres represent H, O, and Ti, respectively.

**Table S3**  $\Delta G$  values for the PCET steps in the mechanism underlying the photoinduced oxidation.

| Reactant         | Step | $\Delta G / \text{eV}$ |
|------------------|------|------------------------|
| HCl              | 1→2  | 2.20                   |
| HCl              | 3→4  | 0.28                   |
| H <sub>2</sub> O | 5→6  | 2.40                   |
| H <sub>2</sub> O | 7→8  | 1.04                   |
| H <sub>2</sub> O | 8→9  | 0.95                   |
| H <sub>2</sub> O | 9→10 | -0.01                  |

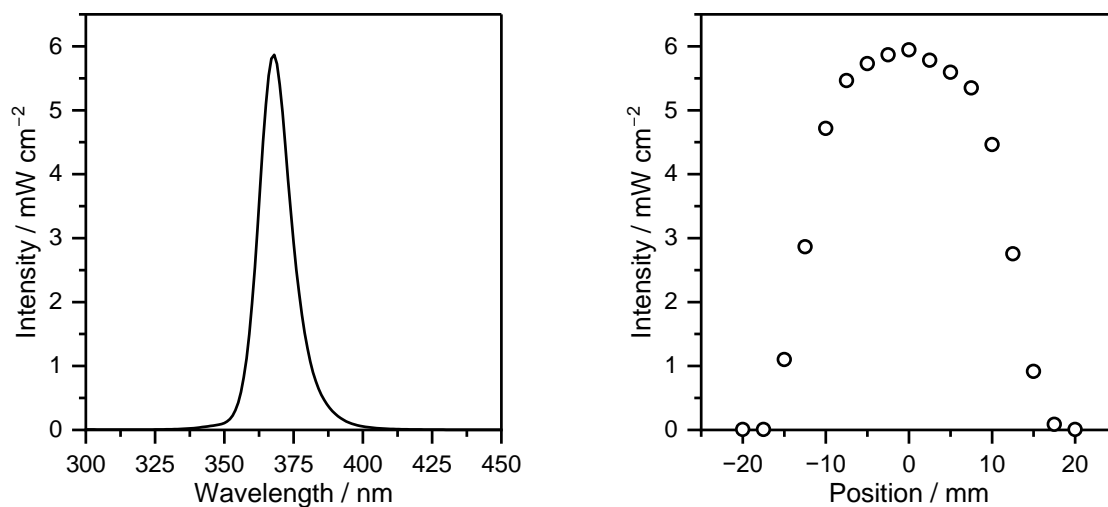

**Fig. S12** Power spectrum of the 365 nm LED lamp acquired using a detector-to-lamp distance of 4 cm.

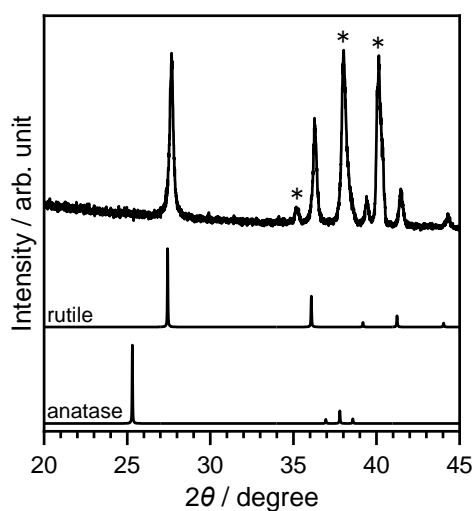

**Fig. S13** XRD pattern of electrode obtained by calcining Ti plate at 973 K in air for 1 h. Asterisks indicate diffraction peaks assigned to the Ti substrate.

## References

- 1 M. J. Frisch, G. W. Trucks, H. B. Schlegel, G. E. Scuseria, M. A. Robb, J. R. Cheeseman, G. Scalmani, V. Barone, G. A. Petersson, H. Nakatsuji, X. Li, M. Caricato, A. V. Marenich, J. Bloino, B. G. Janesko, R. Gomperts, B. Mennucci, H. P. Hratchian, J. V. Ortiz, A. F. Izmaylov, J. L. Sonnenberg, D. Williams-Young, F. Ding, F. Lipparini, F. Egidi, J. Goings, B. Peng, A. Petrone, T. Henderson, D. Ranasinghe, V. G. Zakrzewski, J. Gao, N. Rega, G. Zheng, W. Liang, M. Hada, M. Ehara, K. Toyota, R. Fukuda, J. Hasegawa, M. Ishida, T. Nakajima, Y. Honda, O. Kitao, H. Nakai, T. Vreven, K. Throssell, J. A. Montgomery Jr., J. E. Peralta, F. Ogliaro, M. J. Bearpark, J.

- J. Heyd, E. N. Brothers, K. N. Kudin, V. N. Staroverov, T. A. Keith, R. Kobayashi, J. Normand, K. Raghavachari, A. P. Rendell, J. C. Burant, S. S. Iyengar, J. Tomasi, M. Cossi, J. M. Millam, M. Klene, C. Adamo, R. Cammi, J. W. Ochterski, R. L. Martin, K. Morokuma, O. Farkas, J. B. Foresman and D. J. Fox, *Gaussian 16, Revision C.02*, Gaussian, Inc., Wallingford CT, 2019.
- 2 A. D. Becke, *J. Chem. Phys.*, 1993, **98**, 5648–5652.
  - 3 C. Lee, W. Yang and R. G. Parr, *Phys. Rev. B*, 1988, **37**, 785–789.
  - 4 R. Krishnan, J. S. Binkley, R. Seeger and J. A. Pople, *J. Chem. Phys.*, 1980, **72**, 650–654.
  - 5 P. J. Hay, *J. Chem. Phys.*, 1977, **66**, 4377–4384.
  - 6 H. Kusama, M. Kodera, K. Yamashita and K. Sayama, *Phys. Chem. Chem. Phys.*, 2022, **24**, 5894–5902.
  - 7 X. Zhang, Y. Liu, X. Ma, F. Jin, B. Abulimiti and M. Xiang, *Optik*, 2020, **221**, 165395.
  - 8 Y. Miseki and K. Sayama, *Adv. Energy Mater.*, 2019, **9**, 1801294.
  - 9 S. Yanagida, S. Yanagisawa, K. Yamashita, R. Jono and H. Segawa, *Molecules*, 2015, **20**, 9732–9744.
  - 10 Y. Nosaka and A. Nosaka, *ACS Energy Lett.*, 2016, **1**, 356–359.
  - 11 Y. Nosaka and A. Y. Nosaka, *Chem. Rev.*, 2017, **117**, 11302–11336.
  - 12 S. Yanagida, S. Yanagisawa, K. Yamashita, R. Jono and H. Segawa, *ECS Trans.*, 2017, **80**, 1091–1112.
  - 13 Y. Nakabayashi, N. Suzuki, C. Terashima and A. Fujishima, *J. Phys. Chem. C*, 2021, **125**, 18579–18587.
  - 14 A.-J. Simamora, T.-L. Hsiung, F.-C. Chang, T.-C. Yang, C.-Y. Liao and H. P. Wang, *Int. J. Hydrogen Energy*, 2012, **37**, 13855–13858.
  - 15 S. Cao, T.-S. Chan, Y.-R. Lu, X. Shi, B. Fu, Z. Wu, H. Li, K. Liu, S. Alzuabi, P. Cheng, M. Liu, T. Li, X. Chen and L. Piao, *Nano Energy*, 2020, **67**, 104287.
  - 16 S. M. Ji, H. Jun, J. S. Jang, H. C. Son, P. H. Borse and J. S. Lee, *J. Photochem. Photobiol. A*, 2007, **189**, 141–144.
  - 17 M. M. Ayyub, M. Chhetri, U. Gupta, A. Roy and C. N. R. Rao, *Chem. Eur. J.*, 2018, **24**, 18455–18462.
  - 18 K. Maeda, H. Masuda and K. Domen, *Catal. Today*, 2009, **147**, 173–178.
  - 19 J. Liu, Y. Liu, N. Liu, Y. Han, X. Zhang, H. Huang, Y. Lifshitz, S.-T. Lee, J. Zhong and Z. Kang, *Science*, 2015, **347**, 970–974.
  - 20 P. Zhou, I. A. Navid, Y. Ma, Y. Xiao, P. Wang, Z. Ye, B. Zhou, K. Sun and Z. Mi, *Nature*, 2023, **613**, 66–70.
  - 21 X. Guan, F. A. Chowdhury, N. Pant, L. Guo, L. Vayssieres and Z. Mi, *J. Phys. Chem. C*, 2018, **122**, 13797–13802.
